## Correction

**Correction: Down-regulation of miR-203 induced by *Helicobacter pylori* infection promotes the proliferation and invasion of gastric cancer by targeting CASK****Xiaoying Zhou<sup>1,2,\*</sup>, Guifang Xu<sup>3,\*</sup>, Chengqiang Yin<sup>1,2</sup>, Wujuan Jin<sup>1,2</sup> and Guoxin Zhang<sup>1,2</sup>**<sup>1</sup>Department of Gastroenterology, First Affiliated Hospital of Nanjing Medical University, Nanjing, China<sup>2</sup>First Clinical Medical College of Nanjing Medical University, Nanjing, China<sup>3</sup>Department of Gastroenterology, Affiliated Drum Tower Hospital of Nanjing University Medical School, Nanjing, China

\*These authors contributed equally to the work

**Published:****Copyright:** Zhou et al. This is an open-access article distributed under the terms of the Creative Commons Attribution License 3.0 (CC BY 3.0), which permits unrestricted use, distribution, and reproduction in any medium, provided the original author and source are credited.

**This article has been corrected:** After reviewing the raw data and having two inquiring meetings on August 14 and August 19, 2019 to hear from the authors' report on this issue, the first Affiliated Hospital of Nanjing Medical University concluded that Figure 2B of the Oncotarget paper was correctly presented. However, Figure 2E has been originally published before as Figure 3D in the journal Plos One. It was accidentally reused in this Oncotarget paper in question.

Based on the findings of this investigation, we feel that the application of Figure 2E's erratum by the authors will not change the conclusion that miR-203 inhibits the proliferation and invasion of gastric cancer cells.

Original article: Oncotarget. 2014; 5:11631–11640. <https://doi.org/10.18632/oncotarget.2600>

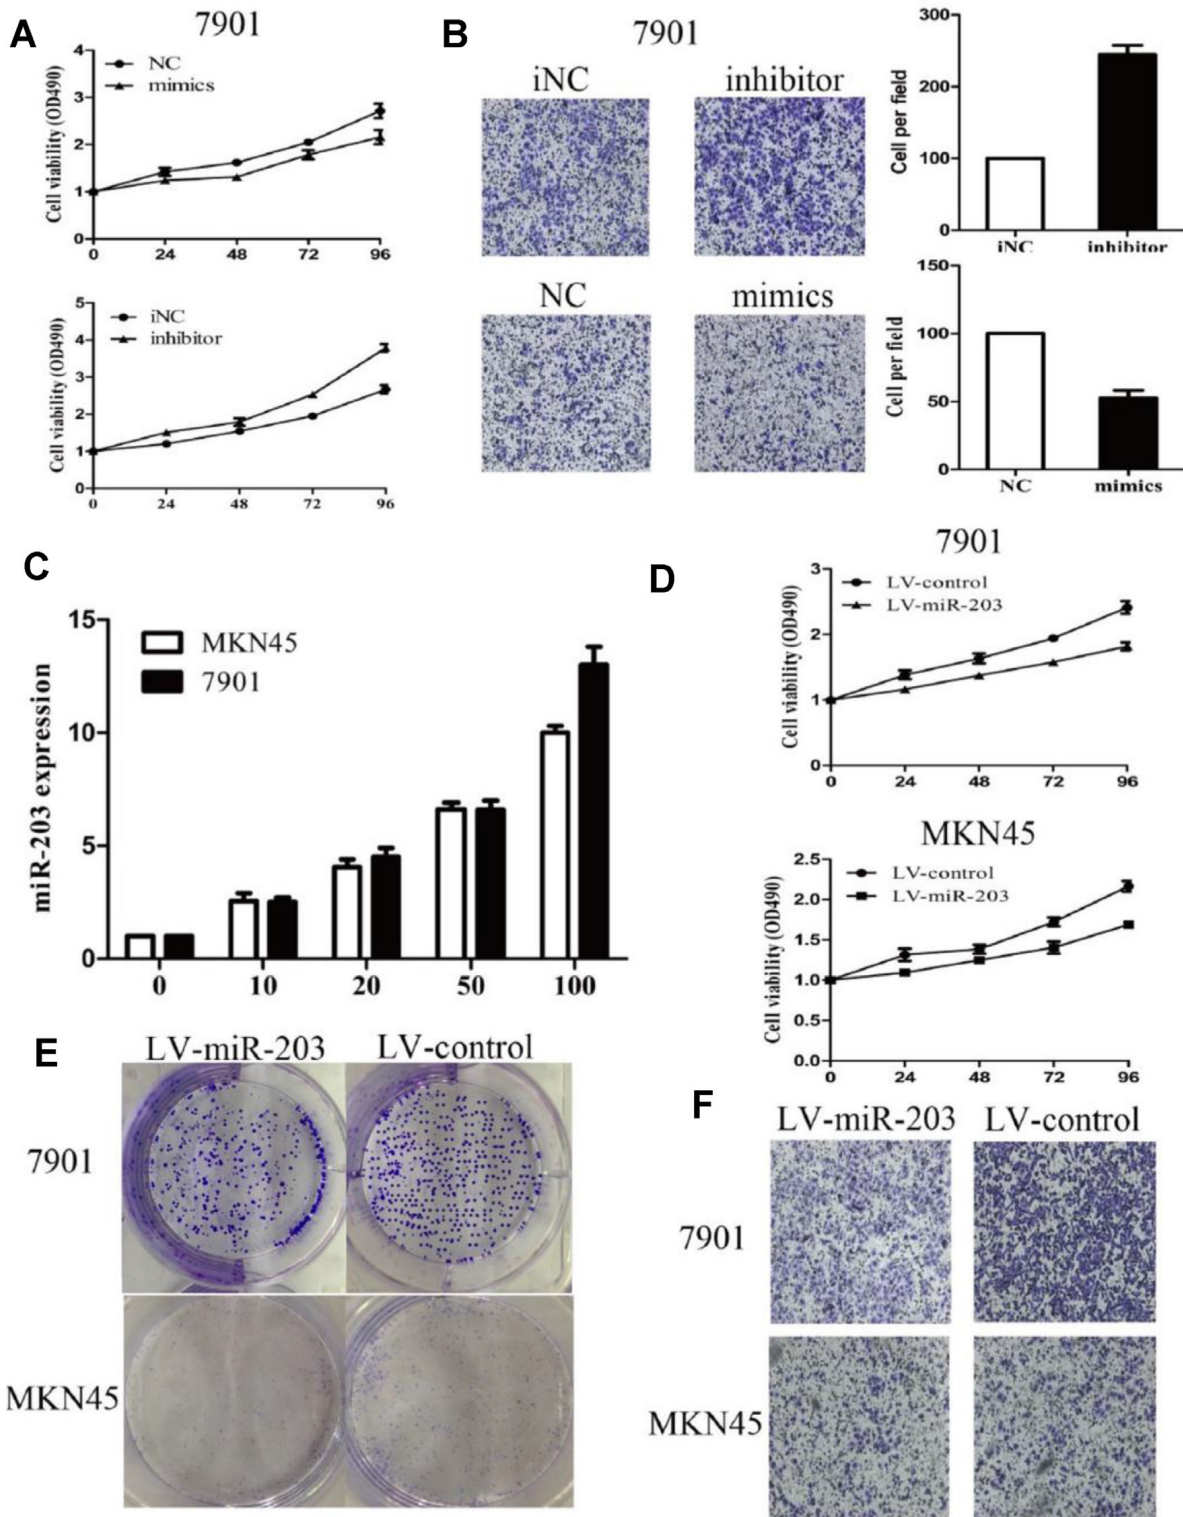

**Figure 2: Effect of miR-203 on 7901 cell growth and invasion.** (A) effect of miR-203 on cell proliferation was measured by MTT assay after transfecting with miR-203 mimics/inhibitor; (B) effect of miR-203 on cell invasion was measured by transwell assay after transfecting with miR-203 mimics/inhibitor; (C) expression levels of miR-203 after 7901 and MKN45 cells were infected with LV-miR-203 at 5 different MOIs. (D) effect of miR-203 on cell proliferation was measured by MTT assay after transfecting with LV-miR-203 at MOI (100:1); (E) effect of miR-203 on cell proliferation was measured by clone assay after transfecting with LV-miR-203 at MOI (100:1); (F) effect of miR-203 on cell invasion was measured by transwell assay after transfecting with LV-miR-203 at MOI (100:1). (\* $p < 0.05$ ).
